# Supplementary material for: Identification of key candidate genes and biological pathways in the synovial tissue of patients with rheumatoid arthritis
Source: PubMed Central journal article supplement — Exp Ther Med. 2022 Apr 4;23(6):368. doi: 10.3892/etm.2022.11295 (PMC9019691; doi:10.3892/etm.2022.11295), 2022-04-04

Figure S1. Protein-Protein Interaction network analysis using the Search Tool for the Retrieval of Interacting Genes/Proteins database.

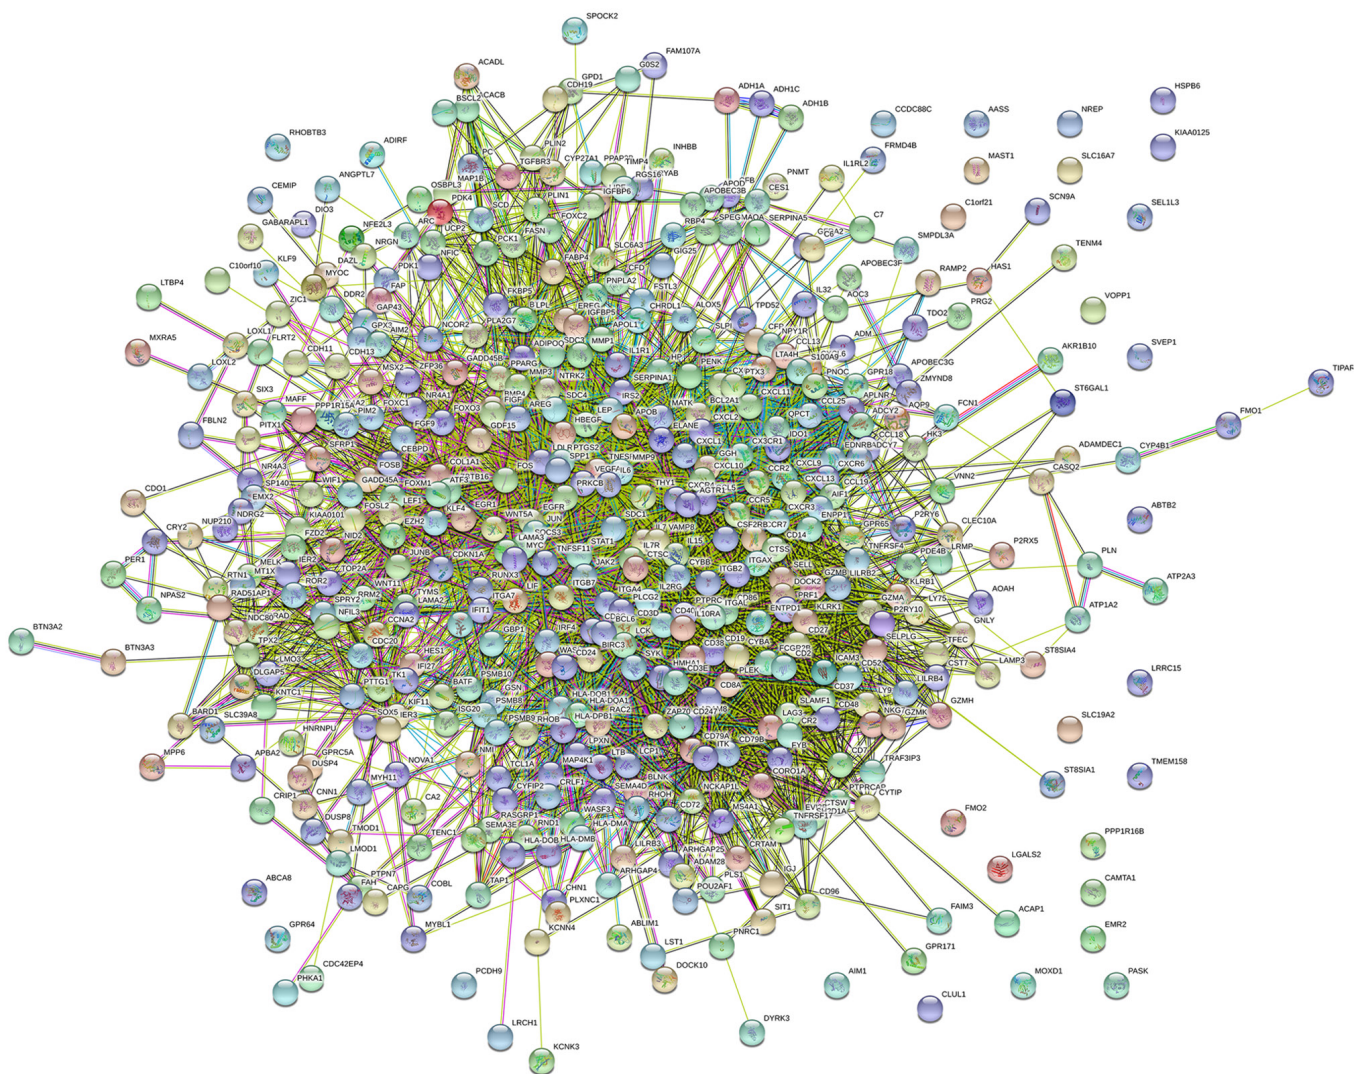

Supplement: Supplementary_Data3.pdf [file Supplementary_Data3.pdf]
